# Supplementary material
Source: MDPI journal article supplement (https://www.mdpi.com/1424-2818/15/7/873)
Supplement: s1 [file s1]

**Table S1.** Environmental parameters for particular sampling points in the Chernaya river estuary.

| 1998 year |           |           |           |           | 2000 year |           |           |           |           |           |
|-----------|-----------|-----------|-----------|-----------|-----------|-----------|-----------|-----------|-----------|-----------|
| Salinity  |           |           |           |           |           |           |           |           |           |           |
|           | Station 1 | Station 2 | Station 3 | Station 4 |           | Station 1 | Station 2 | Station 3 | Station 4 | Station 5 |
| 25-May    | 13        | 2         | 0         | 0         | 25-May    | 8,3       | 2,5       | 0,6       | 0,2       | 0         |
| 1-Jun     | 15        | 0         | 0         | 0         | 1-Jun     | 13,7      | 5,7       | 2,4       | 2,6       | 0         |
| 7-Jun     | 11        | 2         | 0         | 0         | 8-Jun     | 12,7      | 4,7       | 1,9       | 0         | 0         |
| 16-Jun    | 13        | 2         | 0         | 0         | 15-Jun    | 13,7      | 7,6       | 3,8       | 3,2       | 0         |
| 22-Jun    | 13        | 7         | 2         | 0         | 22-Jun    | 14,1      | 9,5       | 5,9       | 4,5       | 0         |
| 29-Jun    | 13        | 13        | 4         | 7         | 29-Jun    | 11,1      | 9,5       | 3,5       | 2,2       | 0,1       |
| 5-Jul     | 13        | 9         | 8         | 4         | 6-Jul     | 12,4      | 11,2      | 5,2       | 4,5       | 0,9       |
| 12-Jul    | 13        | 7         | 2         | 0         | 13-Jul    | 12,1      | 12,3      | 5,5       | 4,6       | 1,1       |
| 20-Jul    | 13        | 9         | 8         | 4         | 19-Jul    | 12,7      | 12,8      | 8,9       | 5,2       | 1,9       |
| 27-Jul    | 13        | 12        | 7         | 4         | 26-Jul    | 17        | 13,2      | 8,7       | 7,2       | 0,9       |
| 2-Aug     | 15        | 13        | 2         | 0         | 2-Aug     | 18,8      | 18,6      | 16,6      | 13,1      | 7         |
| 11-Aug    | 19        | 15        | 9         | 0         | 9-Aug     | 19,2      | 18,1      | 12,3      | 8,1       | 2,5       |
| 17-Aug    | 15        | 14        | 0         | 0         | 13-Aug    | 21        | 18,9      | 14,8      | 11,1      | 6,9       |
| 24-Aug    | 15        | 12        | 13        | 13        | 18-Aug    | 18,1      | 17,2      | 16,4      | 11,6      | 7,1       |
| pH        |           |           |           |           |           |           |           |           |           |           |
|           | Station 1 | Station 2 | Station 3 | Station 4 |           | Station 1 | Station 2 | Station 3 | Station 4 | Station 5 |
| 25-May    | 7,32      | 6,55      | 6,97      | 6,98      | 25-May    | 8,91      | 7,3       | 7,25      | 7,3       | 7,72      |
| 1-Jun     | 7,4       | 6,6       | 7,07      | 6,99      | 1-Jun     | 8,95      | 7,82      | 7,23      | 7,55      | 7,21      |
| 7-Jun     | 7,29      | 6,51      | 6,75      | 6,85      | 8-Jun     | 8,05      | 7,33      | 7,14      | 6,87      | 6,92      |
| 16-Jun    | 7,24      | 6,74      | 6,87      | 7,18      | 15-Jun    | 8         | 7,57      | 7,21      | 7,1       | 6,81      |
| 22-Jun    | 7,27      | 6,6       | 7,16      | 6,94      | 22-Jun    | 8,33      | 8,47      | 8,08      | 7,95      | 7,65      |
| 29-Jun    | 7,46      | 6,8       | 7,4       | 6,43      | 29-Jun    | 8,31      | 8,54      | 8,07      | 7,81      | 7,88      |
| 5-Jul     | 7,55      | 6,78      | 7,2       | 6,42      | 6-Jul     | 8,52      | 8,48      | 7,95      | 8,01      | 7,45      |
| 12-Jul    | 7,41      | 6,95      | 7,23      | 6,17      | 13-Jul    | 8,2       | 8,41      | 7,88      | 8,26      | 7,4       |
| 20-Jul    | 7,36      | 6,93      | 7,36      | 6,48      | 19-Jul    | 8,28      | 8,59      | 8,28      | 7,98      | 7,76      |
| 27-Jul    | 7,44      | 6,88      | 7,42      | 6,66      | 26-Jul    | 8,1       | 8,77      | 8,28      | 8,4       | 7,55      |
| 2-Aug     | 7,97      | 6,64      | 7,08      | 7,23      | 2-Aug     | 7,94      | 8         | 7,9       | 7,69      | 7,45      |
| 11-Aug    | 7,67      | 6,62      | 7,01      | 6,96      | 9-Aug     | 7,95      | 7,73      | 7,99      | 8,18      | 7,6       |
| 17-Aug    | 7,71      | 7,11      | 7,38      | 6,87      | 13-Aug    | 8,07      | 8,09      | 7,79      | 8,2       | 7,49      |
| 24-Aug    | 8,19      | 7,24      | 7,36      | 7,14      | -         | -         | -         | -         | -         | -         |
